# Supplementary material for: Oligoprogression of Solid Tumors on Immune Checkpoint Inhibitors: The Impact of Local Ablative Radiation Therapy
Source: MDPI journal article supplement (doi:10.3390/biomedicines10102481), 2022-10-05
Supplement: s1 [file s1]

**Supplementary Table S1.** Charactersitics of and treatments received by the patients who experienced oligoprogression in this study.

| Patient | Diagnosis            | Sex    | Age at Diagnosis | Disease stage at ICI start | Number of disease sites pre-ICI | Previous Therapy                        | ICI Administered | Best Response on ICI | Time to Oligorogression on ICI (months) | Number of oligoprogressive lesions | Site(s) of oligoprogression        | Did oligoprogression occur in site that existed prior to ICI initiation? | Radiation Dose | Number of Fractions | Progression after local treatment? | Salvage Treatments                     |
|---------|----------------------|--------|------------------|----------------------------|---------------------------------|-----------------------------------------|------------------|----------------------|-----------------------------------------|------------------------------------|------------------------------------|--------------------------------------------------------------------------|----------------|---------------------|------------------------------------|----------------------------------------|
| 1       | HCC                  | Male   | 46.6             | Recurrent                  | 3                               | Surgery, TACE/RFA                       | Nivolumab        | PR                   | 10.5                                    | 2                                  | Aortocaval LNs x 2                 | Old                                                                      | 6000           | 15                  | Yes                                | None                                   |
| 2       | HCC                  | Male   | 69.2             | Recurrent                  | 3                               | Y90                                     | Nivolumab        | PR                   | 5.2                                     | 1                                  | Porta hepatis LN                   | Old                                                                      | 4500           | 5                   | Yes                                | Lenvantinib                            |
| 3       | Adenocarcinoma       | Female | 50.6             | Recurrent                  | 9                               | Surgery + FOLFOX, FOLFIRI + bevacizumab | Nivolumab        | PR                   | 9.6                                     | 1                                  | Liver                              | New                                                                      | 5000           | 5                   | No                                 | None                                   |
| 4       | HCC                  | Male   | 68.7             | Recurrent                  | 3                               | TACE                                    | Nivolumab        | PR                   | 4.5                                     | 1                                  | Portocaval LN                      | Old                                                                      | 4500           | 5                   | No                                 | None                                   |
| 5       | Urothelial Carcinoma | Female | 72.3             | III                        | 0                               | Surgery                                 | Nivolumab        | SD                   | 14.7                                    | 1                                  | Anterior abdominal wall            | New                                                                      | 4500           | 5                   | Yes                                | Erdafitinib, enfortumab vedotin        |
| 6       | HCC                  | Male   | 72.5             | IV                         | 5                               | None                                    | Nivolumab        | PR                   | 8.4                                     | 1                                  | L3                                 | New                                                                      | 2400           | 3                   | No                                 | None                                   |
| 7       | Urothelial Carcinoma | Male   | 68.8             | Recurrent                  | 6                               | TURBT, gemcitabine + cisplatin          | Pembrolizumab    | PR                   | 20.7                                    | 2                                  | Left inguinal LN, left obduator LN | New                                                                      | 2500           | 5                   | Yes                                | SBRT x 2                               |
| 8       | HCC                  | Male   | 66.2             | IV                         | 4                               | None                                    | Nivolumab        | PR                   | 9.1                                     | 2                                  | Left crus, Left adrenal            | Old                                                                      | 5000           | 5                   | Yes                                | SBRT                                   |
| 9       | HCC                  | Female | 64.9             | IV                         | 6                               | None                                    | Nivolumab        | PR                   | 15                                      | 1                                  | Liver                              | New                                                                      | 5000           | 5                   | No                                 | None                                   |
| 10      | HCC                  | Female | 47.8             | Recurrent                  | 1                               | Surgery, TACE                           | Nivolumab        | SD                   | 7.7                                     | 1                                  | Porta hepatis LN                   | New                                                                      | 4500           | 5                   | Yes                                | Lenvantinib, ramucirumab, cabozantinib |

|    |                         |        |      |           |      |                                                                  |               |    |      |   |                      |     |      |    |     |                                          |
|----|-------------------------|--------|------|-----------|------|------------------------------------------------------------------|---------------|----|------|---|----------------------|-----|------|----|-----|------------------------------------------|
| 11 | HCC                     | Male   | 59.4 | Recurrent | 2    | Surgery , Y90                                                    | Nivolumab     | CR | 19.6 | 1 | Right lung           | New | 5000 | 5  | No  | None                                     |
| 12 | HCC                     | Female | 64.7 | Recurrent | 3    | TACE                                                             | Nivolumab     | PR | 4.5  | 1 | Liver                | New | 4000 | 5  | No  | None                                     |
| 13 | HCC                     | Male   | 33.6 | Recurrent | 3    | Sorafenib,<br>TACE, SBRT                                         | Nivolumab     | SD | 10.9 | 1 | Portal vein          | New | 5000 | 5  | No  | None                                     |
| 14 | Urothelial<br>Carcinoma | Male   | 49.0 | IV        | > 10 | None                                                             | Pembrolizumab | SD | 15.9 | 1 | Celiac LN            | New | 5000 | 10 | Yes | SBRT x 2,<br>enfortumab<br>vedotin       |
| 15 | Urothelial<br>Carcinoma | Male   | 71.7 | Recurrent | 3    | Surgery,<br>intravesical<br>BCG,<br>gemcitabine +<br>carboplatin | Atezolizumab  | PR | 32.4 | 1 | Left nephrectomy bed | Old | 5000 | 5  | Yes | Pembrolizumab +<br>enfortumab<br>vedotin |
| 16 | HCC                     | Female | 61.7 | Recurrent | 5    | Surgery                                                          | Nivolumab     | SD | 12.8 | 1 | Extrahepatic mass    | Old | 5000 | 20 | Yes | Y90, TACE, RFA                           |
| 17 | Adenocarcinoma          | Male   | 59.0 | Recurrent | 4    | Surgery,<br>gemcitabine +<br>cisplatin,<br>FOLFIRINOX,<br>Y90    | Pembrolizumab | CR | 14.9 | 1 | Right adrenal gland  | Old | 4800 | 4  | No  | None                                     |
| 18 | Adenocarcinoma          | Female | 60.8 | Recurrent | 3    | ChemoRT with<br>5-FU, surgery                                    | Pembrolizumab | PR | 11.3 | 1 | Para-aortic LNs      | New | 5500 | 25 | Yes | SBRT                                     |
| 19 | HCC                     | Male   | 59.4 | IV        | 8    | None                                                             | Pembrolizumab | CR | 9.1  | 1 | Liver                | Old | 5000 | 5  | No  | None                                     |
| 20 | HCC                     | Female | 64.7 | Recurrent | 1    | TACE, surgery                                                    | Pembrolizumab | PR | 32.8 | 1 | Liver                | Old | 4500 | 15 | No  | None                                     |

|    |                      |        |      |           |      |                                     |                        |    |      |   |                                    |     |      |    |     |                                             |
|----|----------------------|--------|------|-----------|------|-------------------------------------|------------------------|----|------|---|------------------------------------|-----|------|----|-----|---------------------------------------------|
| 21 | HCC                  | Female | 68.3 | Recurrent | 2    | Surgery                             | Nivolumab              | PR | 20.8 | 1 | Liver                              | Old | 4500 | 5  | No  | None                                        |
| 22 | Urothelial Carcinoma | Male   | 69.0 | Recurrent | 7    | TURBT + intravesicular BCG, surgery | Nivolumab              | CR | 9.3  | 1 | Left inguinal LN                   | New | 3000 | 5  | Yes | Pembrolizumab, SBRT                         |
| 23 | Colorectal Cancer    | Male   | 40.3 | Recurrent | > 10 | Surgery                             | Nivolumab              | CR | 7.4  | 1 | Lung                               | New | 4800 | 3  | No  | None                                        |
| 24 | Urothelial Carcinoma | Male   | 68.7 | Recurrent | 1    | TURBT, gemcitabine + cisplatin      | Pembrolizumab          | SD | 31.3 | 2 | Left inguinal LN, left obduator LN | New | 2500 | 5  | Yes | SBRT                                        |
| 25 | HCC                  | Male   | 58.9 | IV        | 2    | RT                                  | Nivolumab              | PR | 3.5  | 2 | Liver                              | New | 4000 | 5  | Yes | Lenvantinib                                 |
| 26 | RCC                  | Female | 55.1 | Recurrent | 4    | Surgery, pazopanib, RT              | Nivolumab              | SD | 5.4  | 1 | Right kidney                       | Old | 4800 | 3  | Yes | Cabozantinib, Axitinib, Avelumab, Tivozanib |
| 27 | Melanoma             | Male   | 54.3 | IV        | 10   | RT                                  | Ipilimumab + Nivolumab | SD | 5.3  | 1 | Right intraparotid LN              | Old | 3000 | 5  | No  | None                                        |
| 28 | Urothelial Carcinoma | Male   | 78.9 | IV        | > 10 | Gemcitabine + cisplatin             | Pembrolizumab          | SD | 16.4 | 2 | Bladder and kidney                 | Old | 6000 | 30 | Yes | Enfortumab vedotin                          |
| 29 | NSCLC                | Female | 70.8 | IV        | 2    | RT, carboplatin + pemetrexed        | Atezolizumab           | SD | 11.4 | 1 | L3                                 | New | 1800 | 1  | Yes | RT, pembrolizumab                           |
| 30 | HCC                  | Male   | 68.6 | Recurrent | 6    | Y90, RT, sorafenib                  | Nivolumab              | PR | 15.7 | 1 | Liver                              | Old | 4500 | 5  | Yes | RFA                                         |
